# Supplementary material for: A rapid method for assessing the RNA-binding potential of a protein
Source: PubMed Central journal article supplement — Nucleic Acids Res. 2012 Apr 3;40(14):e105. doi: 10.1093/nar/gks285 (PMC3413103; doi:10.1093/nar/gks285), 2012-04-03
Supplement: supp_gks285_nar-02760-met-g-2011-File010.pdf [file supp_gks285_nar-02760-met-g-2011-File010.pdf]

PP1  
5'-CGGAATTCTA CGAATTTTTTC TTTTGTTTAT TTCCTTTCGC TTTGCTTCTC TTCCCTTCGT TCTGTTCCGT TTTACCTTGT  
CTTGCCTTAT CTTACTTTA-3'

PP2  
5'-TATCTTACTT TAGTTTTATT TAATGTGTT GACTCTCCT CTGCGTTCAC TTAGCTTAAC TTGGTTTGGC TTGATTTGAC  
TTCAGTTGCG CTCTATTCTA-3'

PP3  
5'-CGCTCTATTC TACTGTCCCTG TGCATTCAAT CGTTGAGTTC GATCTAGTCT CGTCTAACCC TCCCCTGCTC CGCTGGTCTG  
GCCTCGCCTA TCCTACCCAT-3'

PP4  
5'-TATCCTACCC ATTGGGCTCA TCTGATCCAT CCGGTCCCGT CCACTCGGCT ATGTTATGCT GTATTGCAGT CGTGTCCGCT  
CGAGCTGCC TAATCCCACC-3'

PP5  
5'-CTAATCCCA CCTAGCGTAT CGGGTCAATGT AGTGCTACGT TACGGCCCCCG CCCGGCATCA TATTATATCA CCCAGTGTA  
ATGTGGTGTG AGGTTGGAG-3'

PP6  
5'-GTGAGGTTGG AGTCCGACCT GGAATCTCAG CCTGACGTGC CATGCGGTGC GATGTCACGC CGCGCCACGG TATAGTATGG  
TACGGGATCC CG-3'

PP7  
5'-TAAAGTAAGA TAAGCAAGA CAAGTAAAA CGGAACAGAA CCGAAGGGAA GAGAAGCAA GCGAAAGGAA ATAAACAAA  
GAAAAATTCG TAGAATCCG-3'

PP8  
5'-TAGAATAGAG CGCAACTGAA GTCAAATCAA GCCAAACCA GTTAAGCTAA GTGAACGCAG AGGAGAGTAC AACACAATTA  
AATGAACTA AAGTAAGATA-3'

PP9  
5'-ATGGGTAGGA TAGGCGAGGC CAGACCAGCG GAGCAGGGGAG GGTAGACGA GACTAGATCG AACTCAACGA TTGAATGCAC  
AGGACAGTAG AATAGAGCG-3'

PP10  
5'-GGTGGGATTA GGGCAGCTCG ACGCGACACG ACTGCAATAC AGCATAACAT AGCCGAGTGG ACGGGACCGG ATGGATCAGA  
TGAGCCCAAT GGGTAGGATA-3'

PP11  
5'-CTCCAACCTC ACACCACATT AACTGGGGT GATATAATAT GATGCCGGC GGGGGCCGTA ACGTAGCACT ACATGACCCG  
ATACGCTAGG TGGGATTAGG-3'

PP12  
5'CGGGATCCCG TACCATACTA TACCGTGGCG CGGCGTGACA TCGCACCGCA TGGCACGTCA GGCTGAGATT CCAGGTCGGA  
CTCCAACCTCAC-3'

### Supplementary Figure S1. List of Pentaprobe sequences encoding every possible 5 nt long motif

DNA versions of all synthetic, single stranded Pentaprobcs, which together encode every possible 5 nt sequence. PP1 is reverse complementary to PP7, PP2 to PP8, and so forth, which enables production of dsDNA sequences.

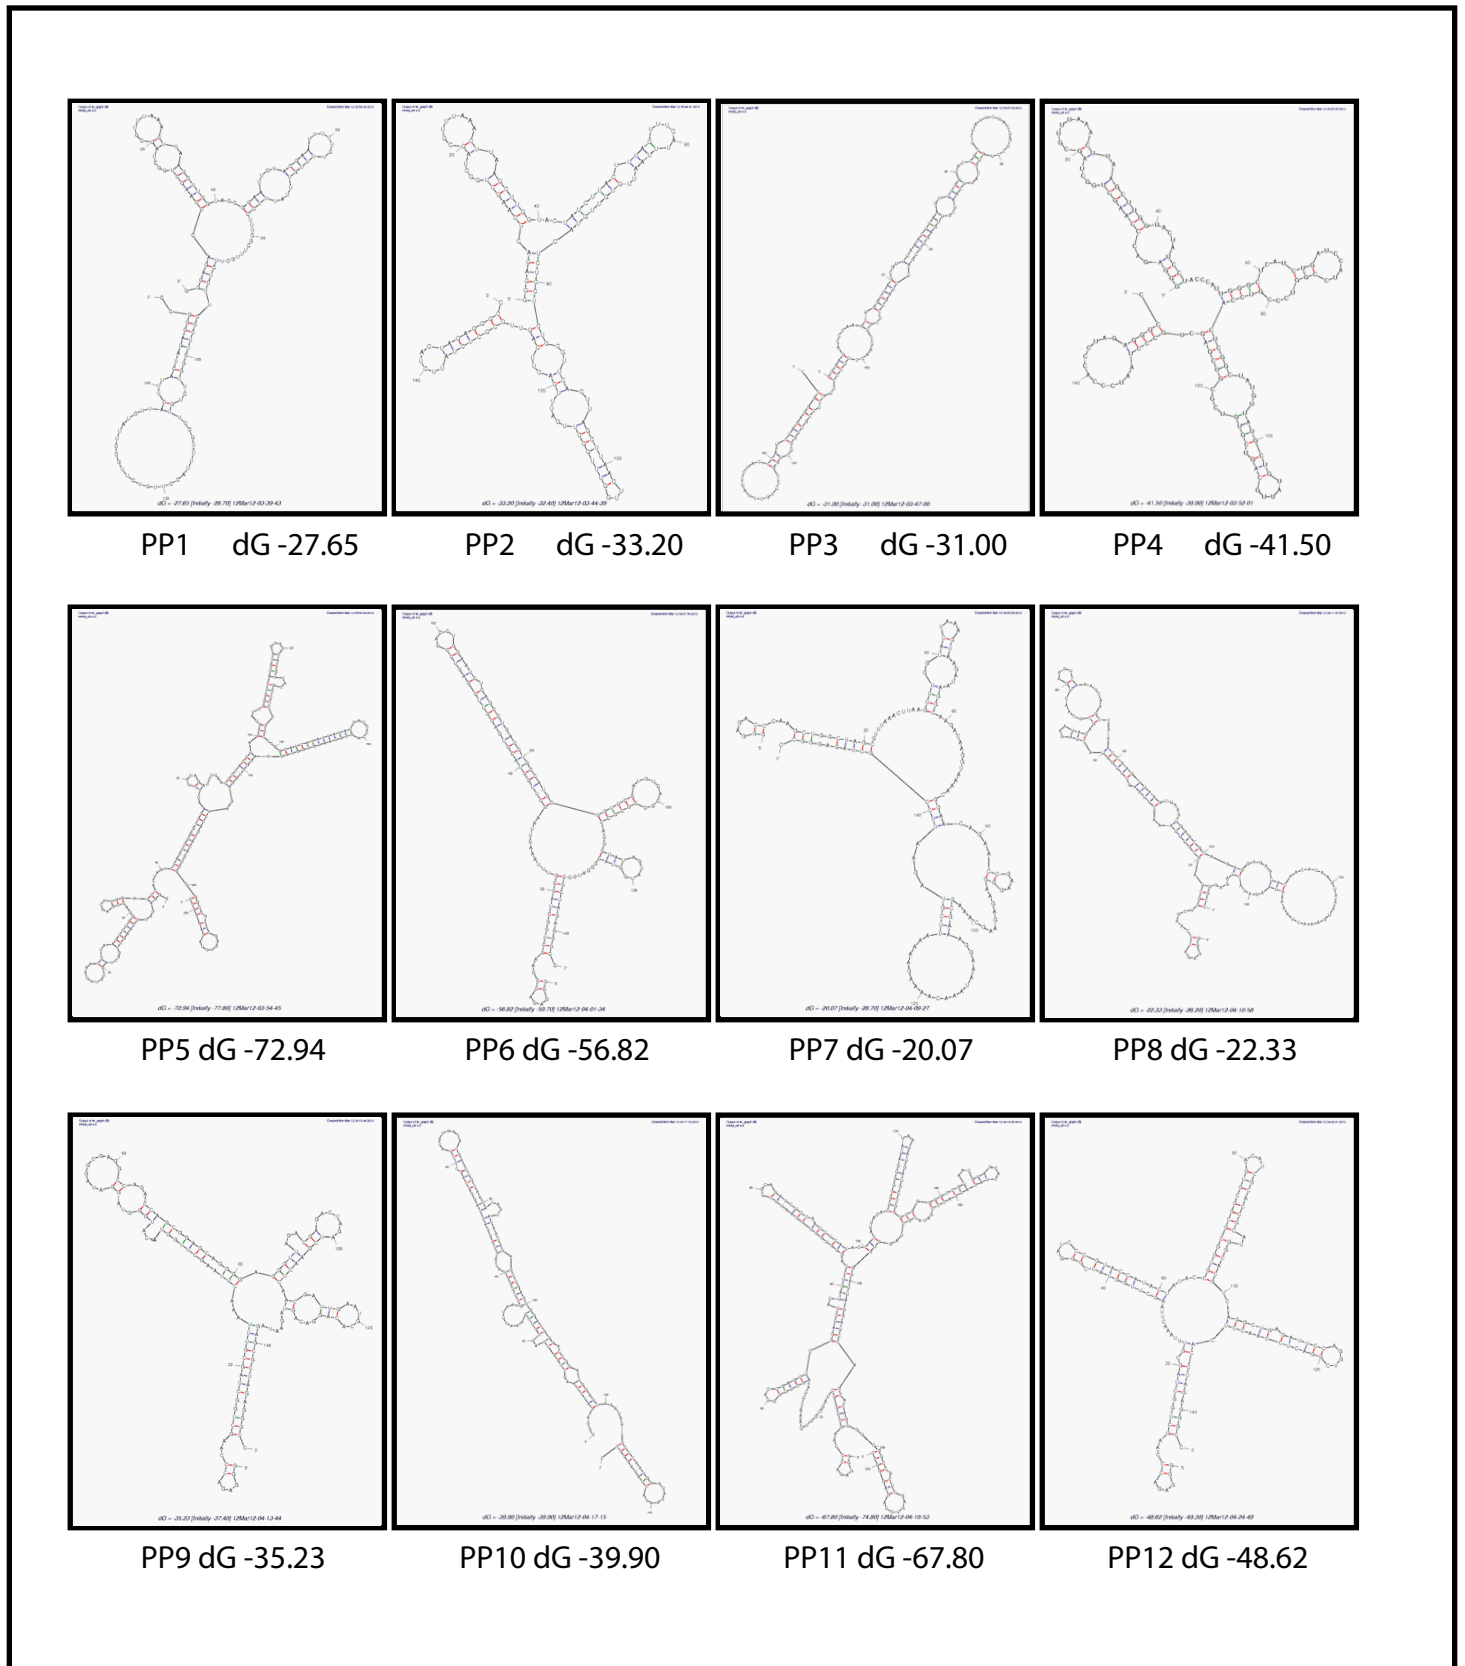

**Supplementary Figure S2. Secondary structure of RNA pentaprobe predicted by the Mfold web server**

Each pentaprobe is represented as one secondary structure, predicted by Mfold web server, and the according free energy is indicated below each structure. In each case we show the structure with the lowest free energy, any other structure observed is energetically less favourable.

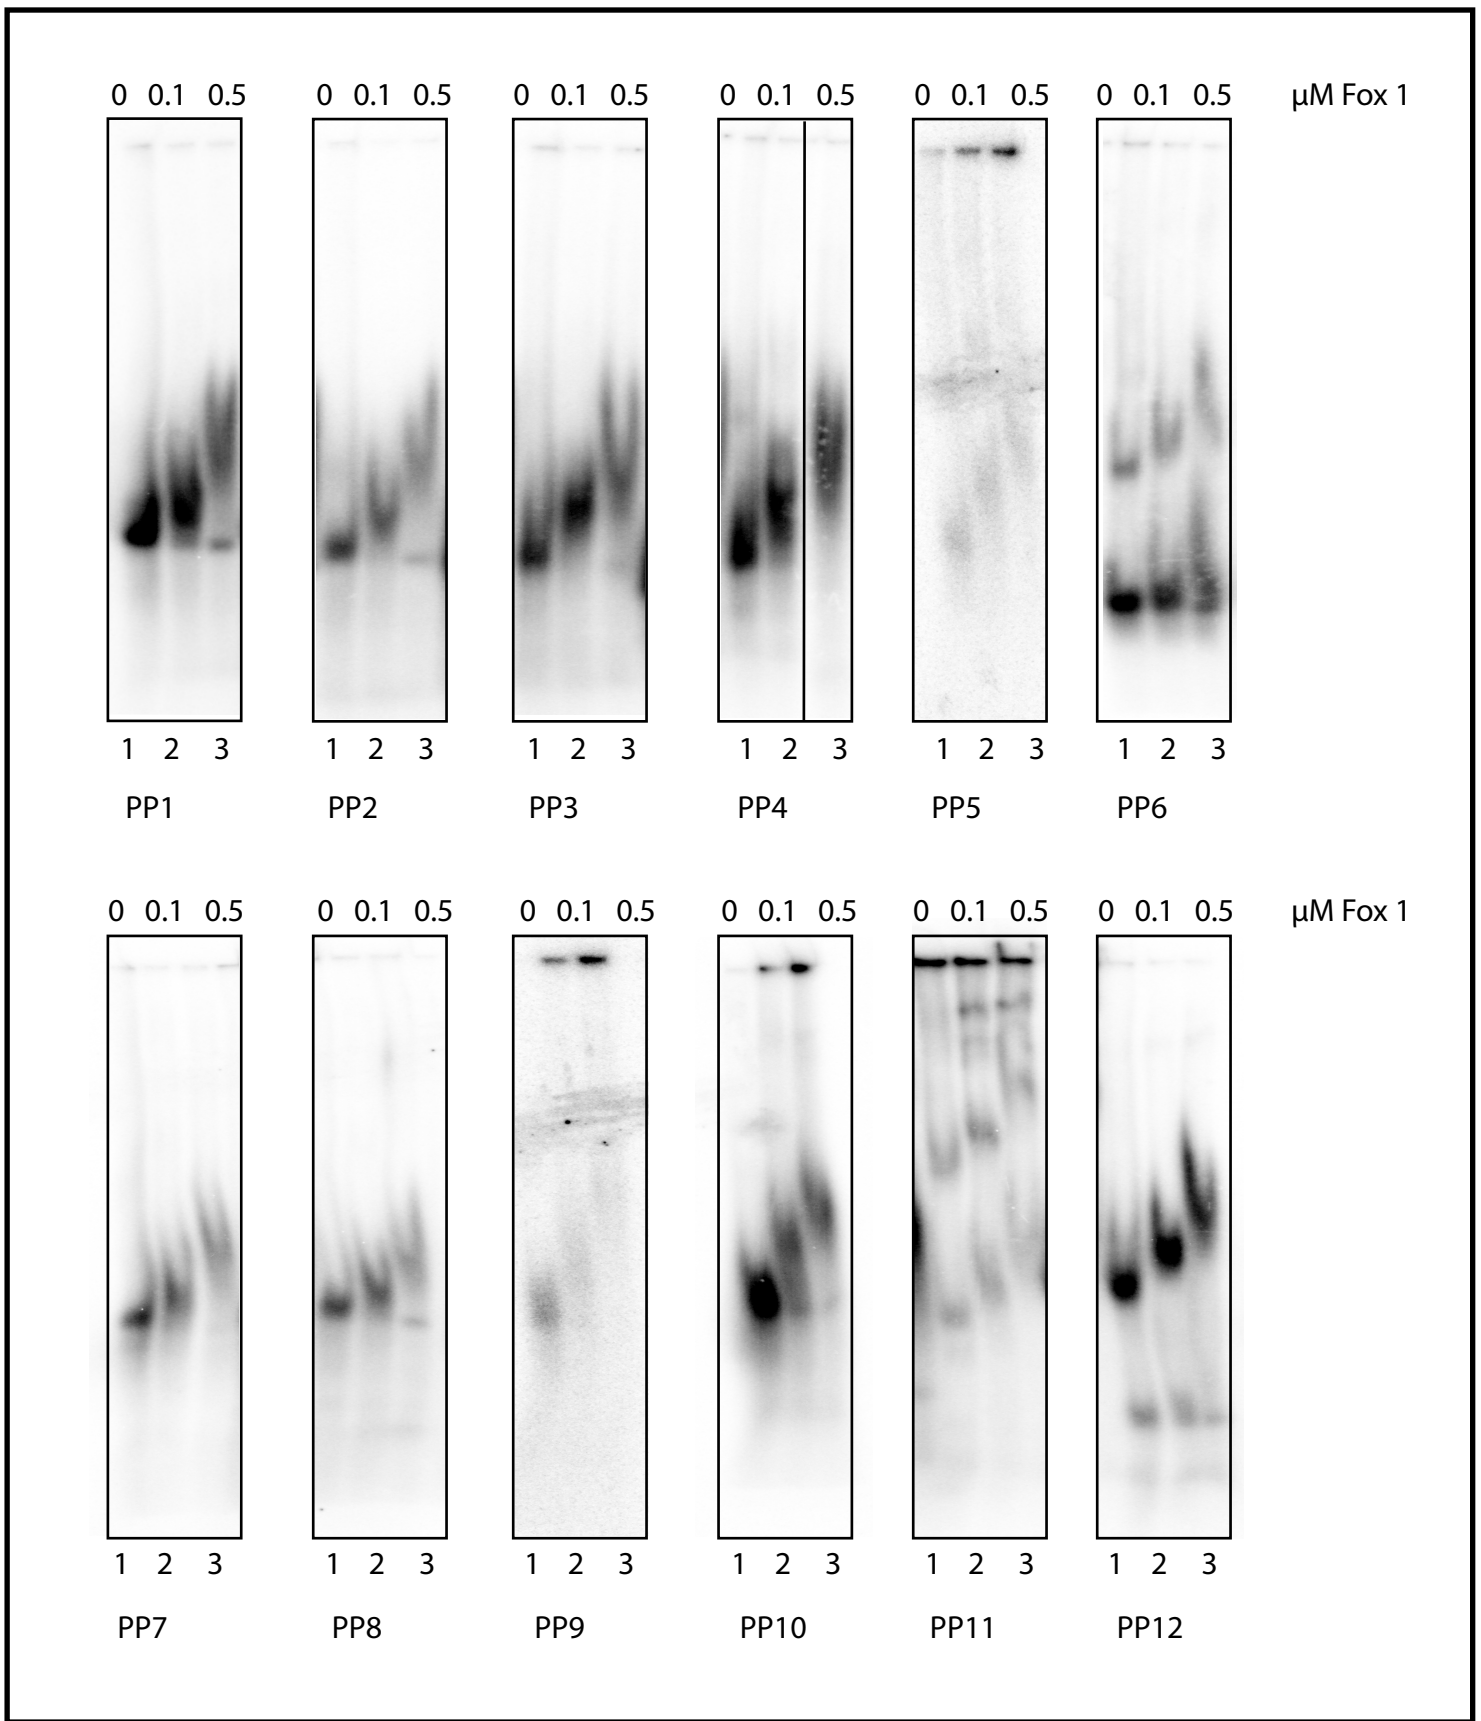

**Supplementary Figure S3. Fox 1 binding to each of the Pentaprobe sequences**

Each Pentaprobe is shown bound to Fox 1. Lane 1 represents the probe alone, lane 2 and 3 show 0.1 and 0.5 μM protein, respectively.
